# Supplementary material for: Levels of DNA methylation and transcript accumulation in leaves of transgenic maize varieties
Source: PubMed Central journal article supplement (PMC5120055; doi:10.1186/s12302-016-0097-2), 2016-11-23

CyMATE (c) 2007, 2008

Methylation overview of 'cry1A.105\_fragment.afa'

Class 1: ● me    ○ not me  
Class 2: ■ me    □ not me  
Class 3: ► me    ▷ not me

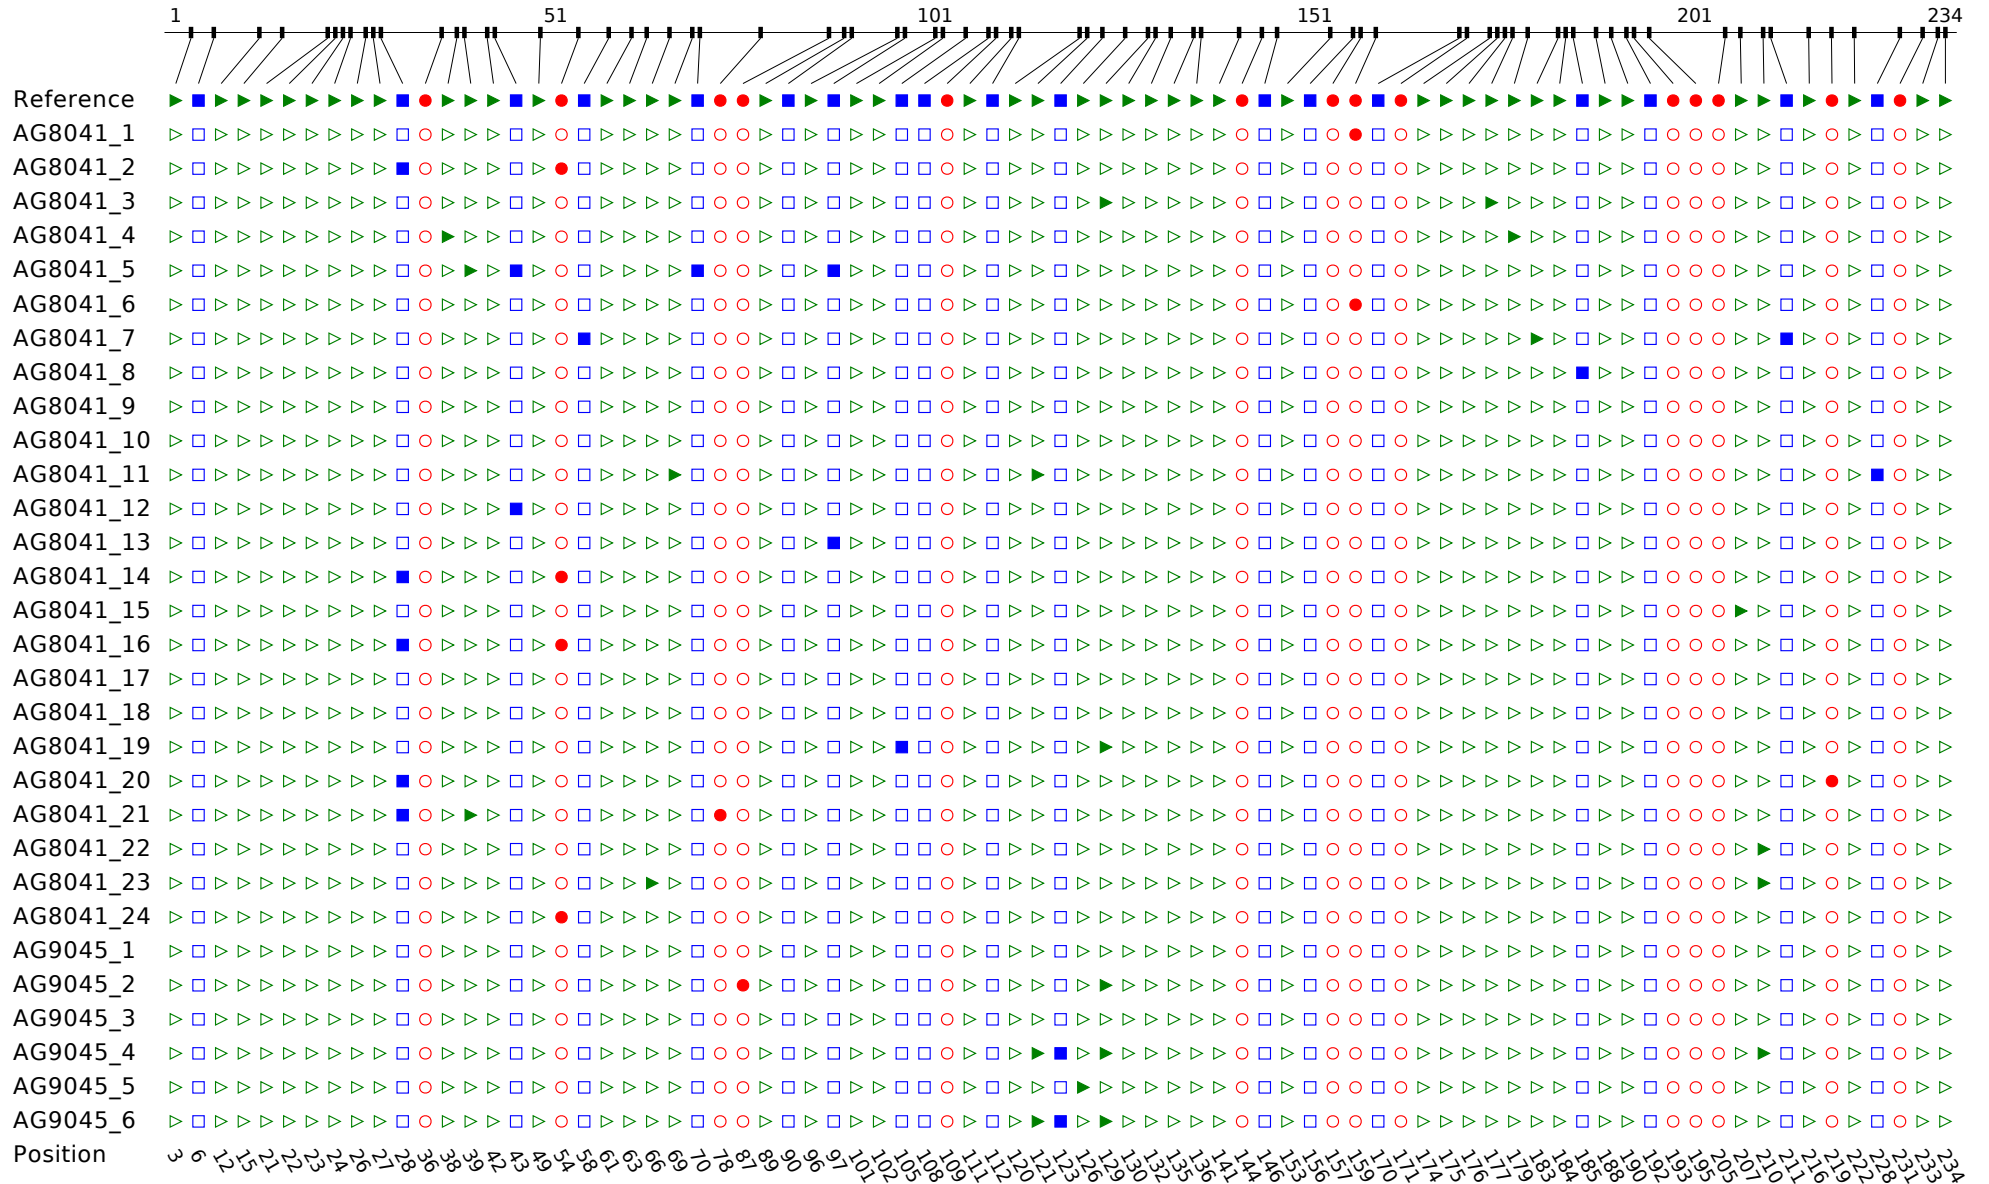

CyMATE (c) 2007, 2008

Methylation overview of 'cry1A.105\_fragment.afa'

Class 1: ● me ○ not me  
Class 2: ■ me □ not me  
Class 3: ► me ▷ not me

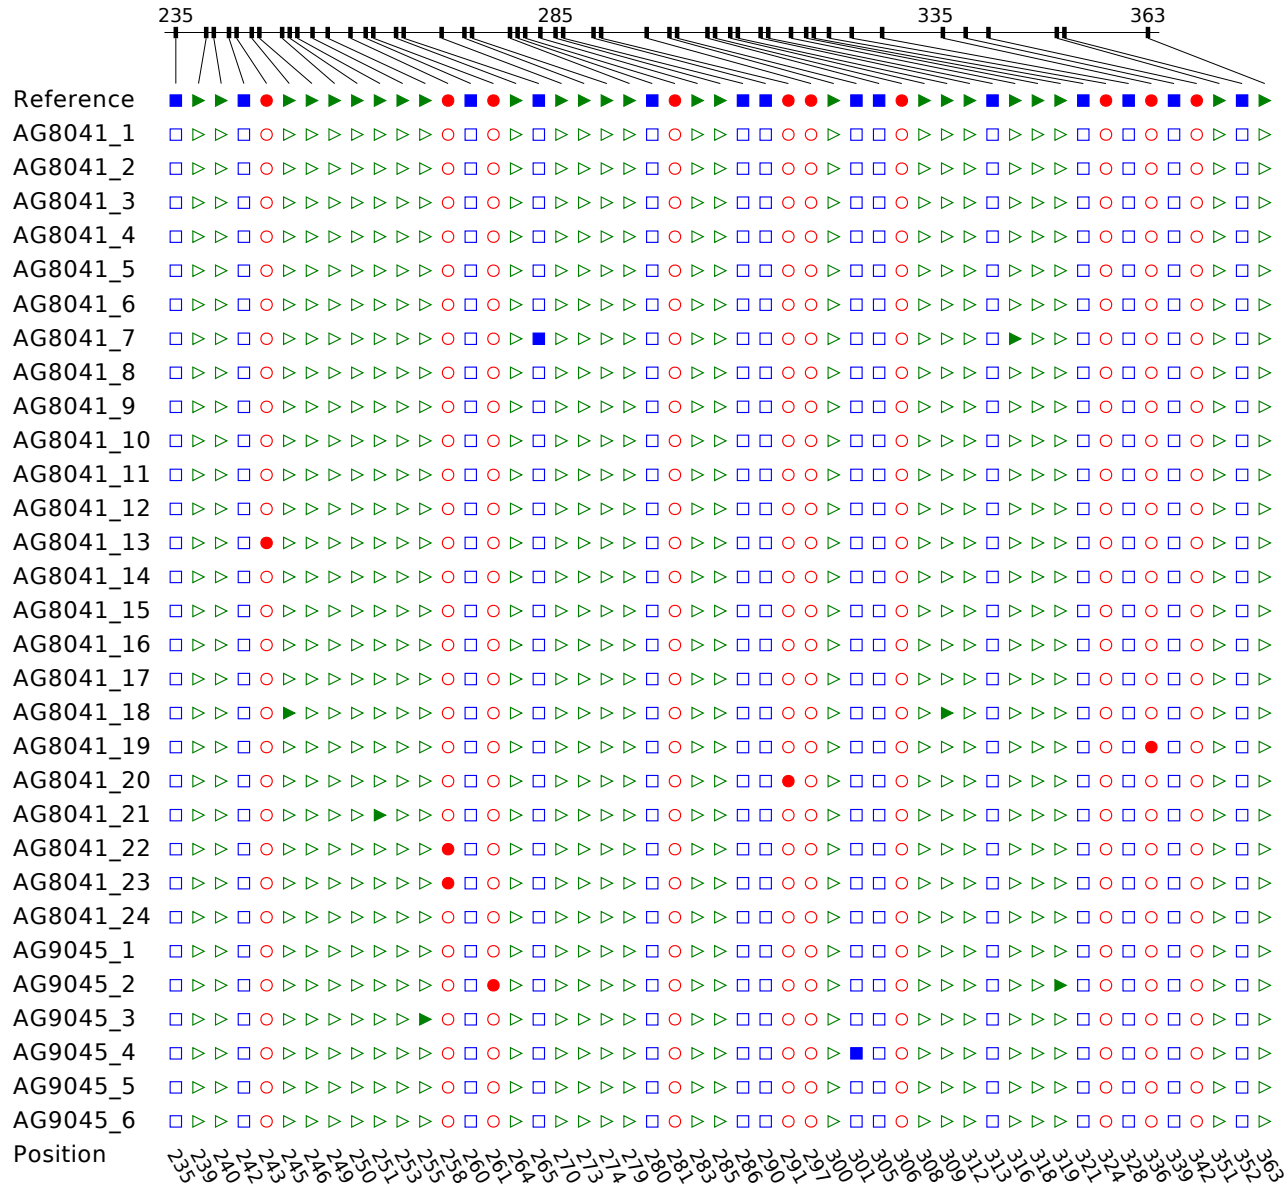

CyMATE (c) 2007, 2008

Methylation overview of 'cry1A.105\_fragment.afa'

Class 1: ● me    ○ not me  
Class 2: ■ me    □ not me  
Class 3: ► me    ▷ not me

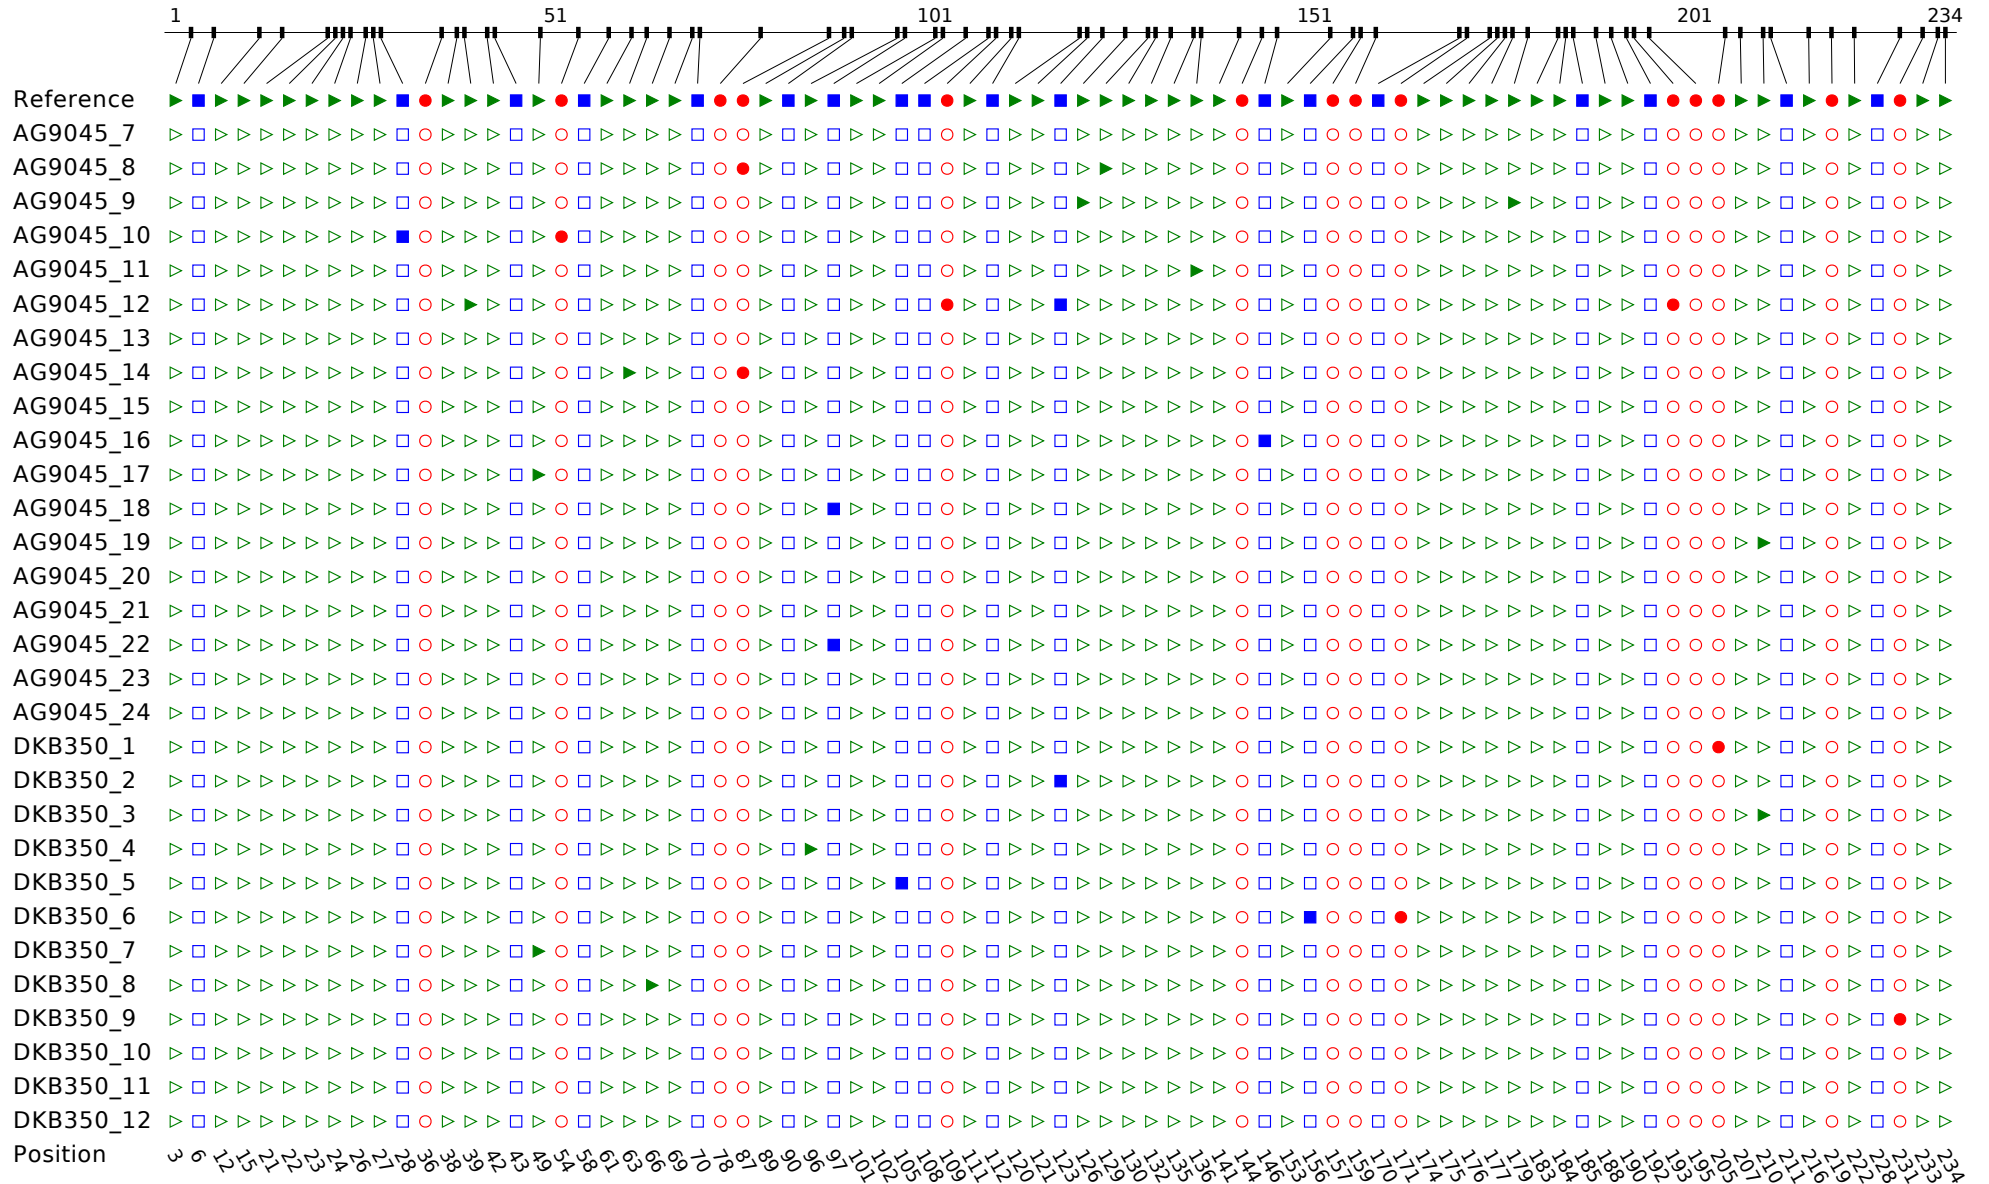

CyMATE (c) 2007, 2008

Methylation overview of 'cry1A.105\_fragment.afa'

Class 1: ● me    ○ not me  
Class 2: ■ me    □ not me  
Class 3: ► me    ▷ not me

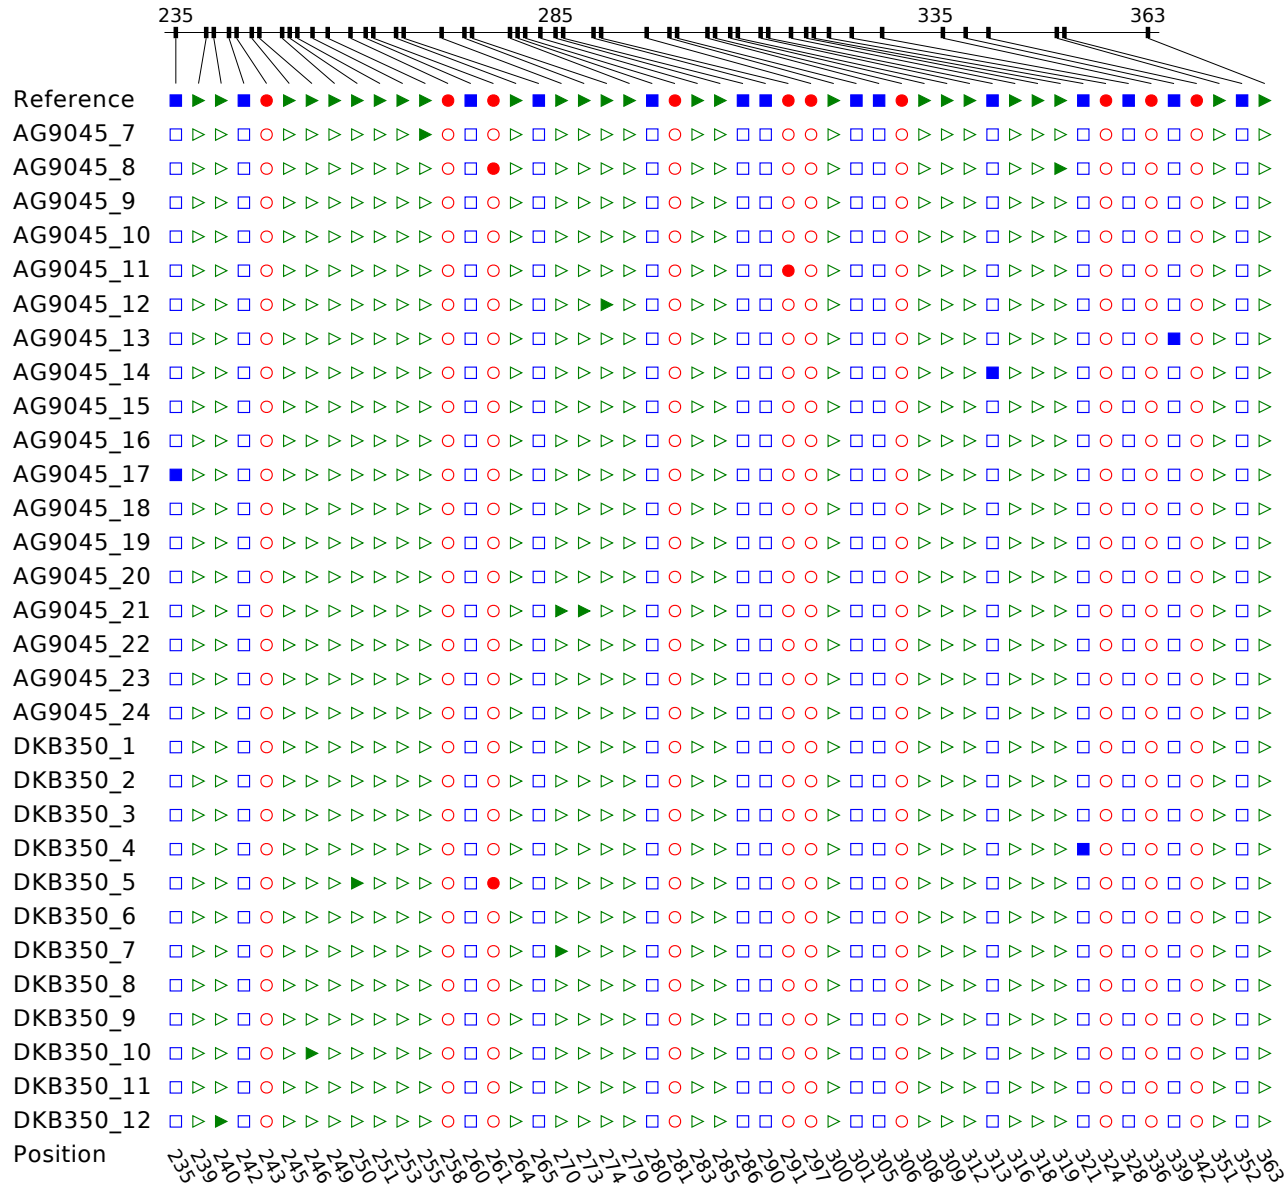

CyMATE (c) 2007, 2008

Methylation overview of 'cry1A.105\_fragment.afa'

Class 1: ● me    ○ not me  
Class 2: ■ me    □ not me  
Class 3: ▲ me    ▼ not me

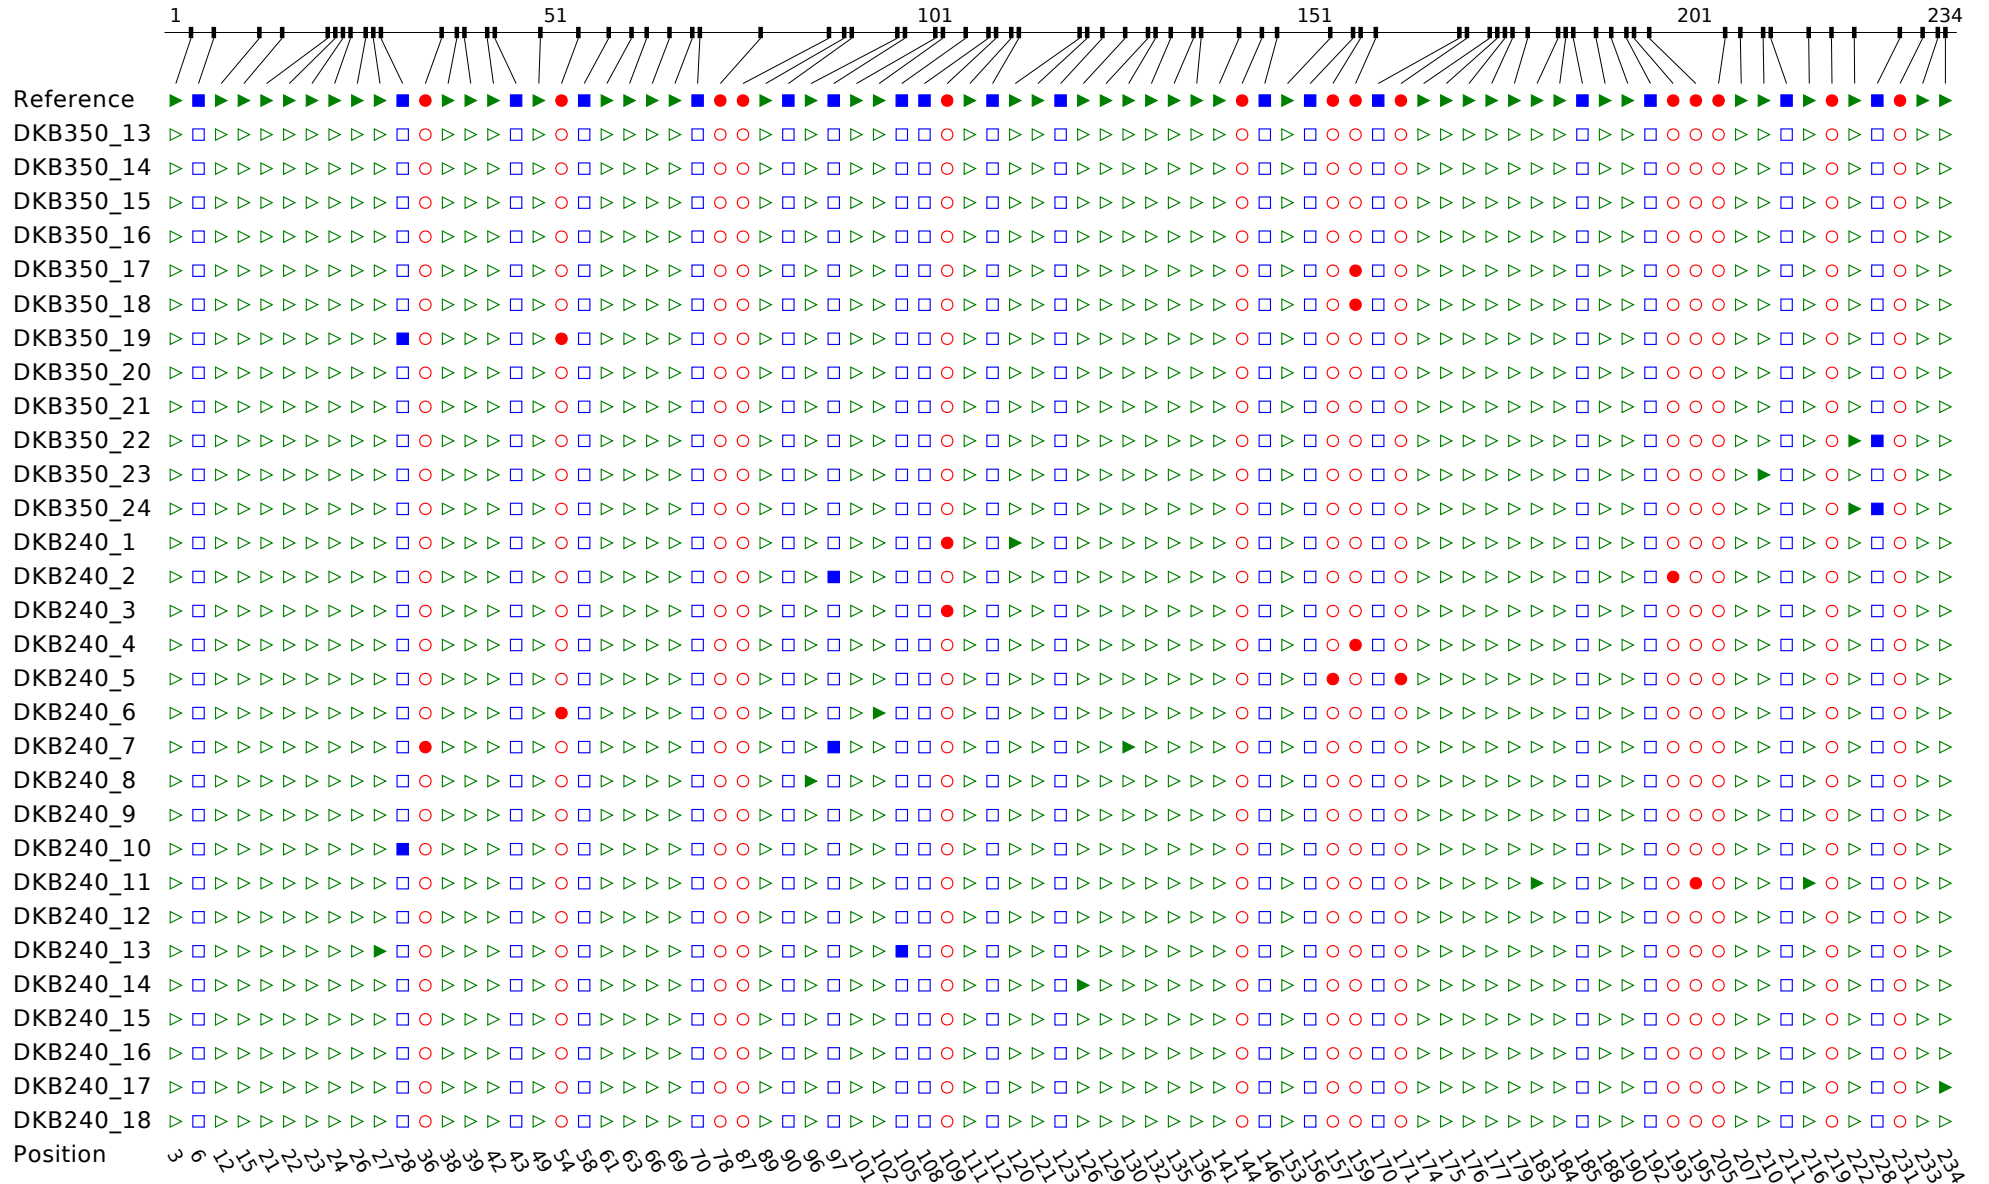

CyMATE (c) 2007, 2008

Methylation overview of 'cry1A.105\_fragment.afa'

Class 1: ● me    ○ not me  
Class 2: ■ me    □ not me  
Class 3: ► me    ▷ not me

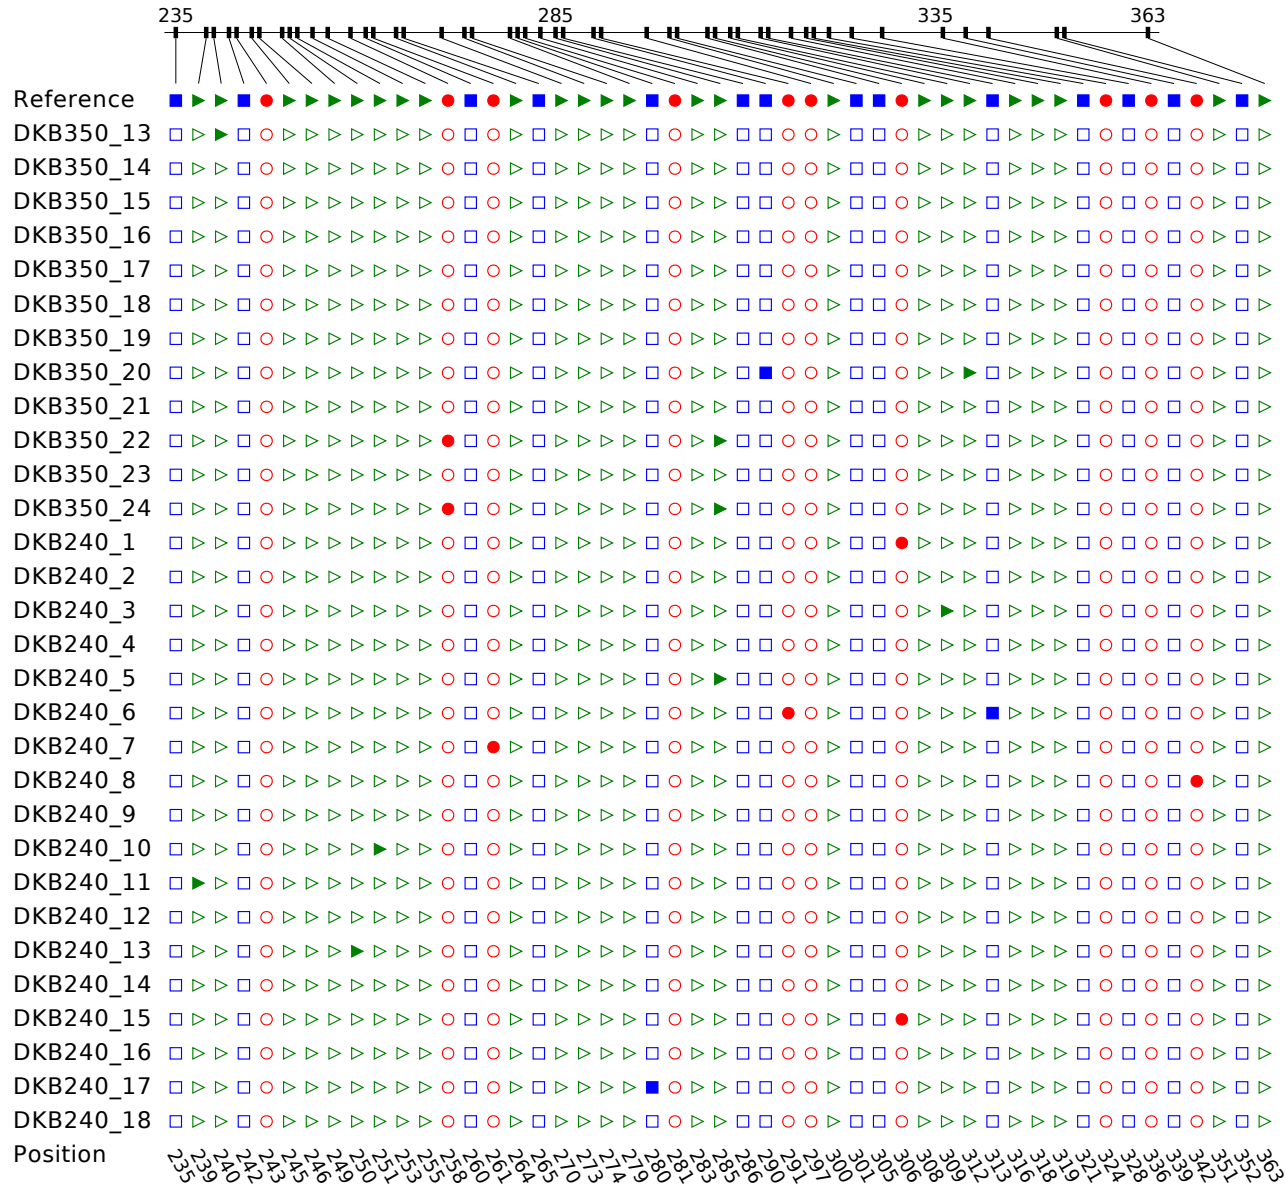



CyMATE (c) 2007, 2008  
 Methylation overview of 'cry1A.105\_fragment.afa'

Class 1: ● me ○ not me  
 Class 2: ■ me □ not me  
 Class 3: ► me ▷ not me

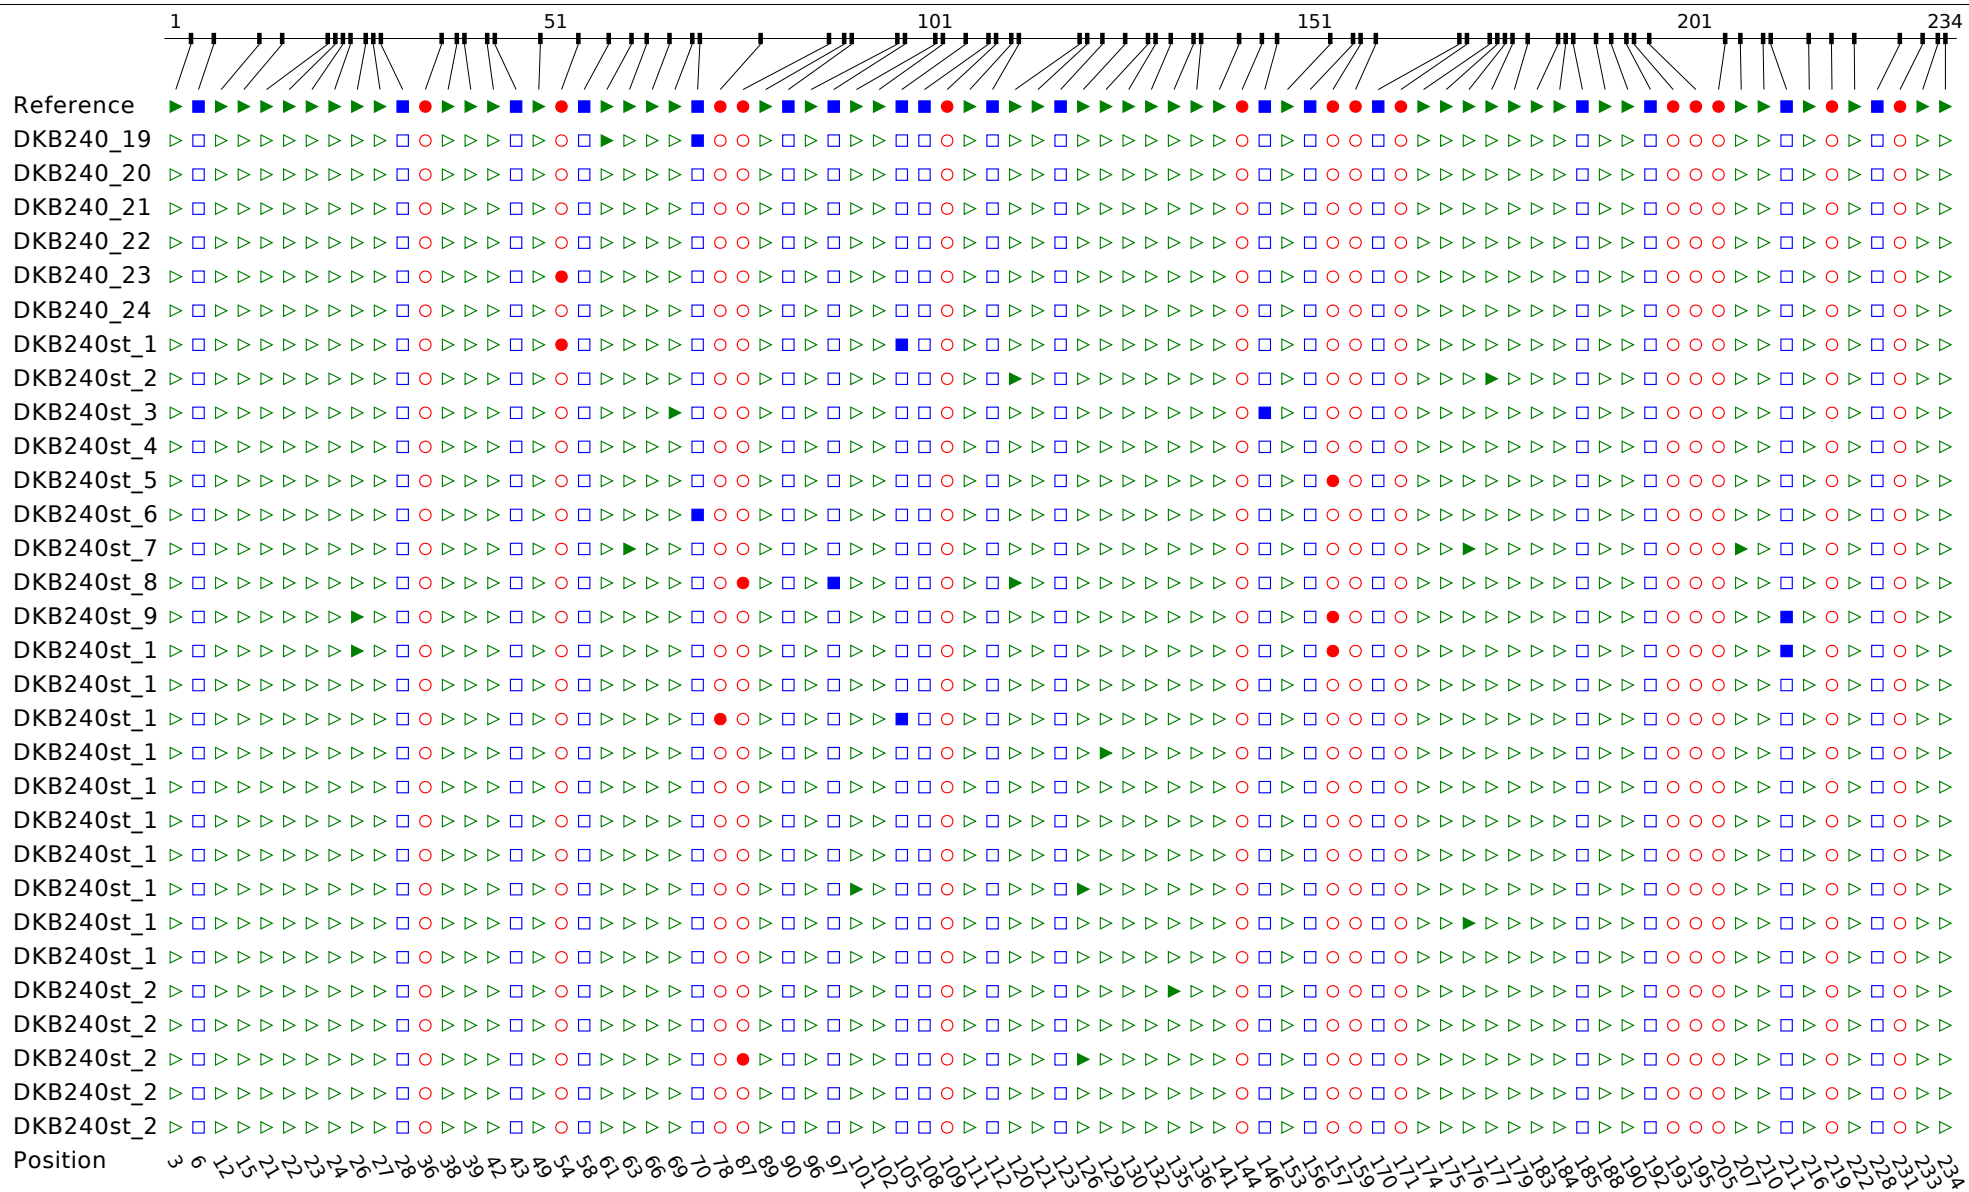

CyMATE (c) 2007, 2008  
 Methylation overview of 'cry1A.105\_fragment.afa'

Class 1: ● me ○ not me  
 Class 2: ■ me □ not me  
 Class 3: ► me ◄ not me

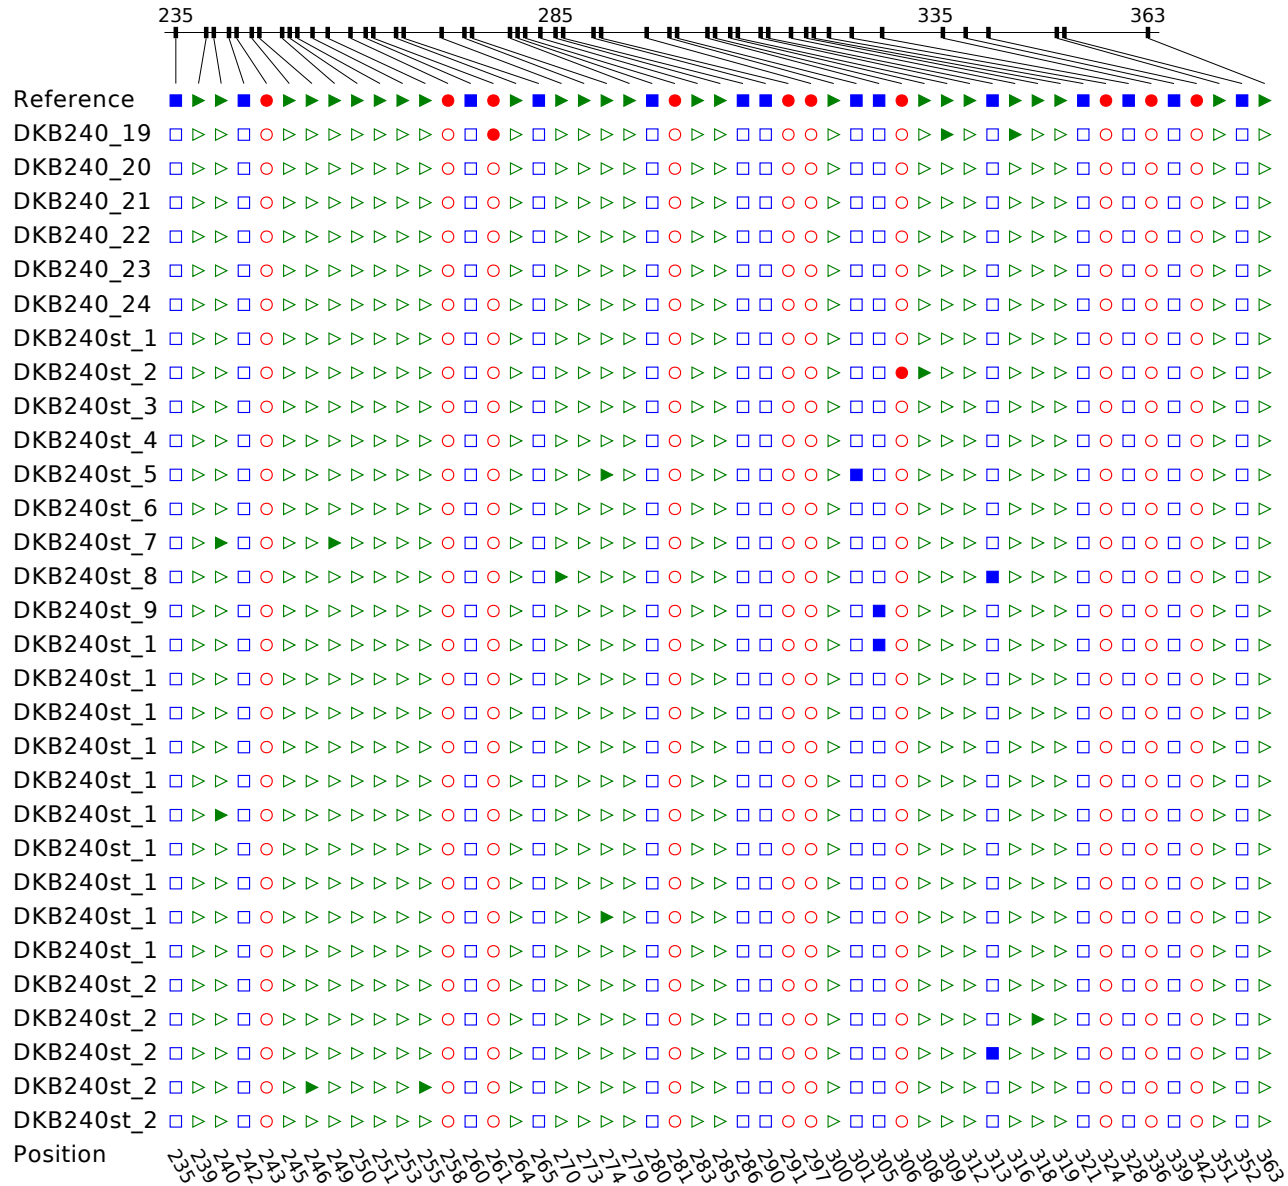

Supplement: 12302_2016_97_MOESM4_ESM.pdf [file 12302_2016_97_MOESM4_ESM.pdf]
