# Supplementary material for: Levels of DNA methylation and transcript accumulation in leaves of transgenic maize varieties
Source: PubMed Central journal article supplement (PMC5120055; doi:10.1186/s12302-016-0097-2), 2016-11-23

CyMATE (c) 2007, 2008  
 Methylation overview of 'FMV\_fragment.afa'

Class 1: ● me      ○ not me  
 Class 2: ■ me      □ not me  
 Class 3: ► me      ▷ not me

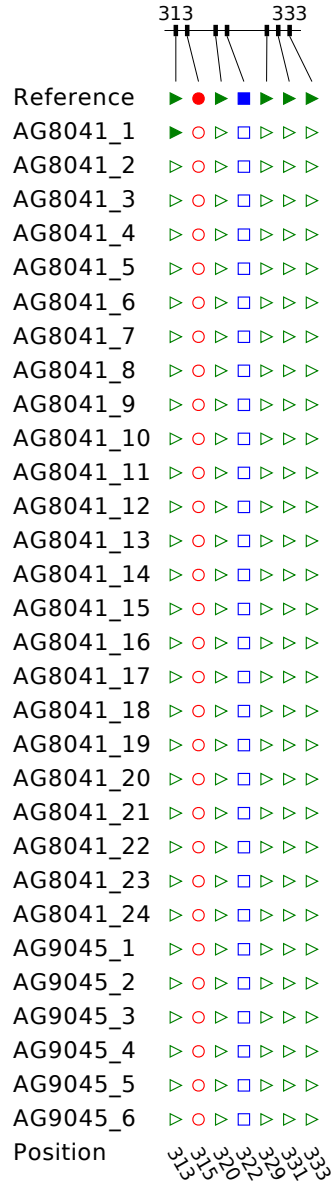

CyMATE (c) 2007, 2008  
 Methylation overview of 'FMV\_fragment.afa'

Class 1: ● me    ○ not me  
 Class 2: ■ me    □ not me  
 Class 3: ► me    ▷ not me

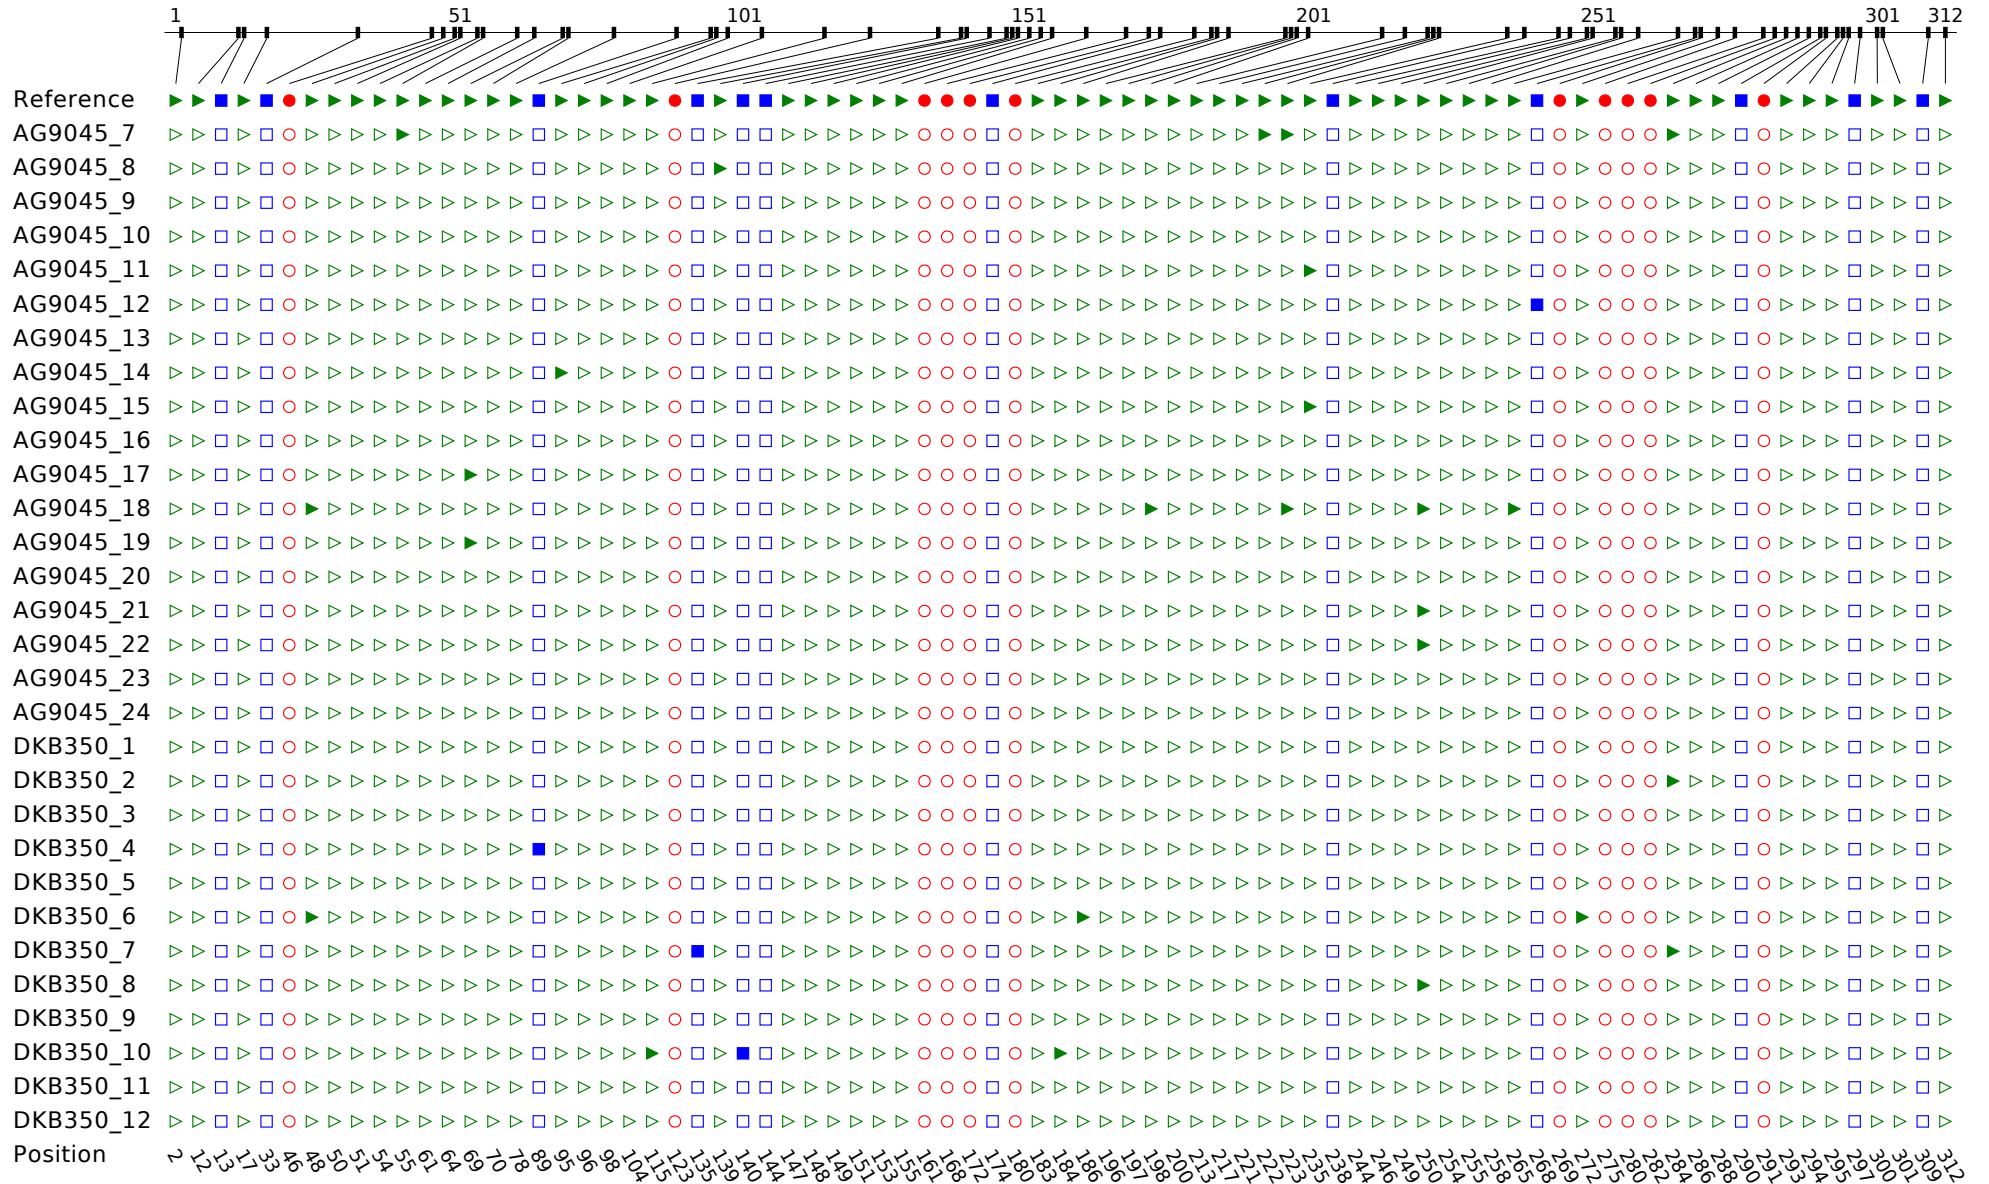

CyMATE (c) 2007, 2008  
Methylation overview of 'FMV\_fragment.afa'

Class 1: ● me      ○ not me  
Class 2: ■ me      □ not me  
Class 3: ► me      ▷ not me

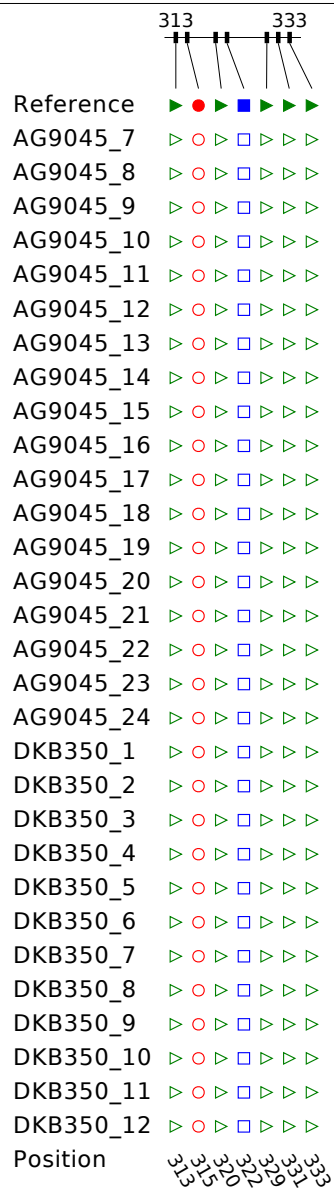

CyMATE (c) 2007, 2008  
 Methylation overview of 'FMV\_fragment.afa'

Class 1: ● me    ○ not me  
 Class 2: ■ me    □ not me  
 Class 3: ► me    ▷ not me

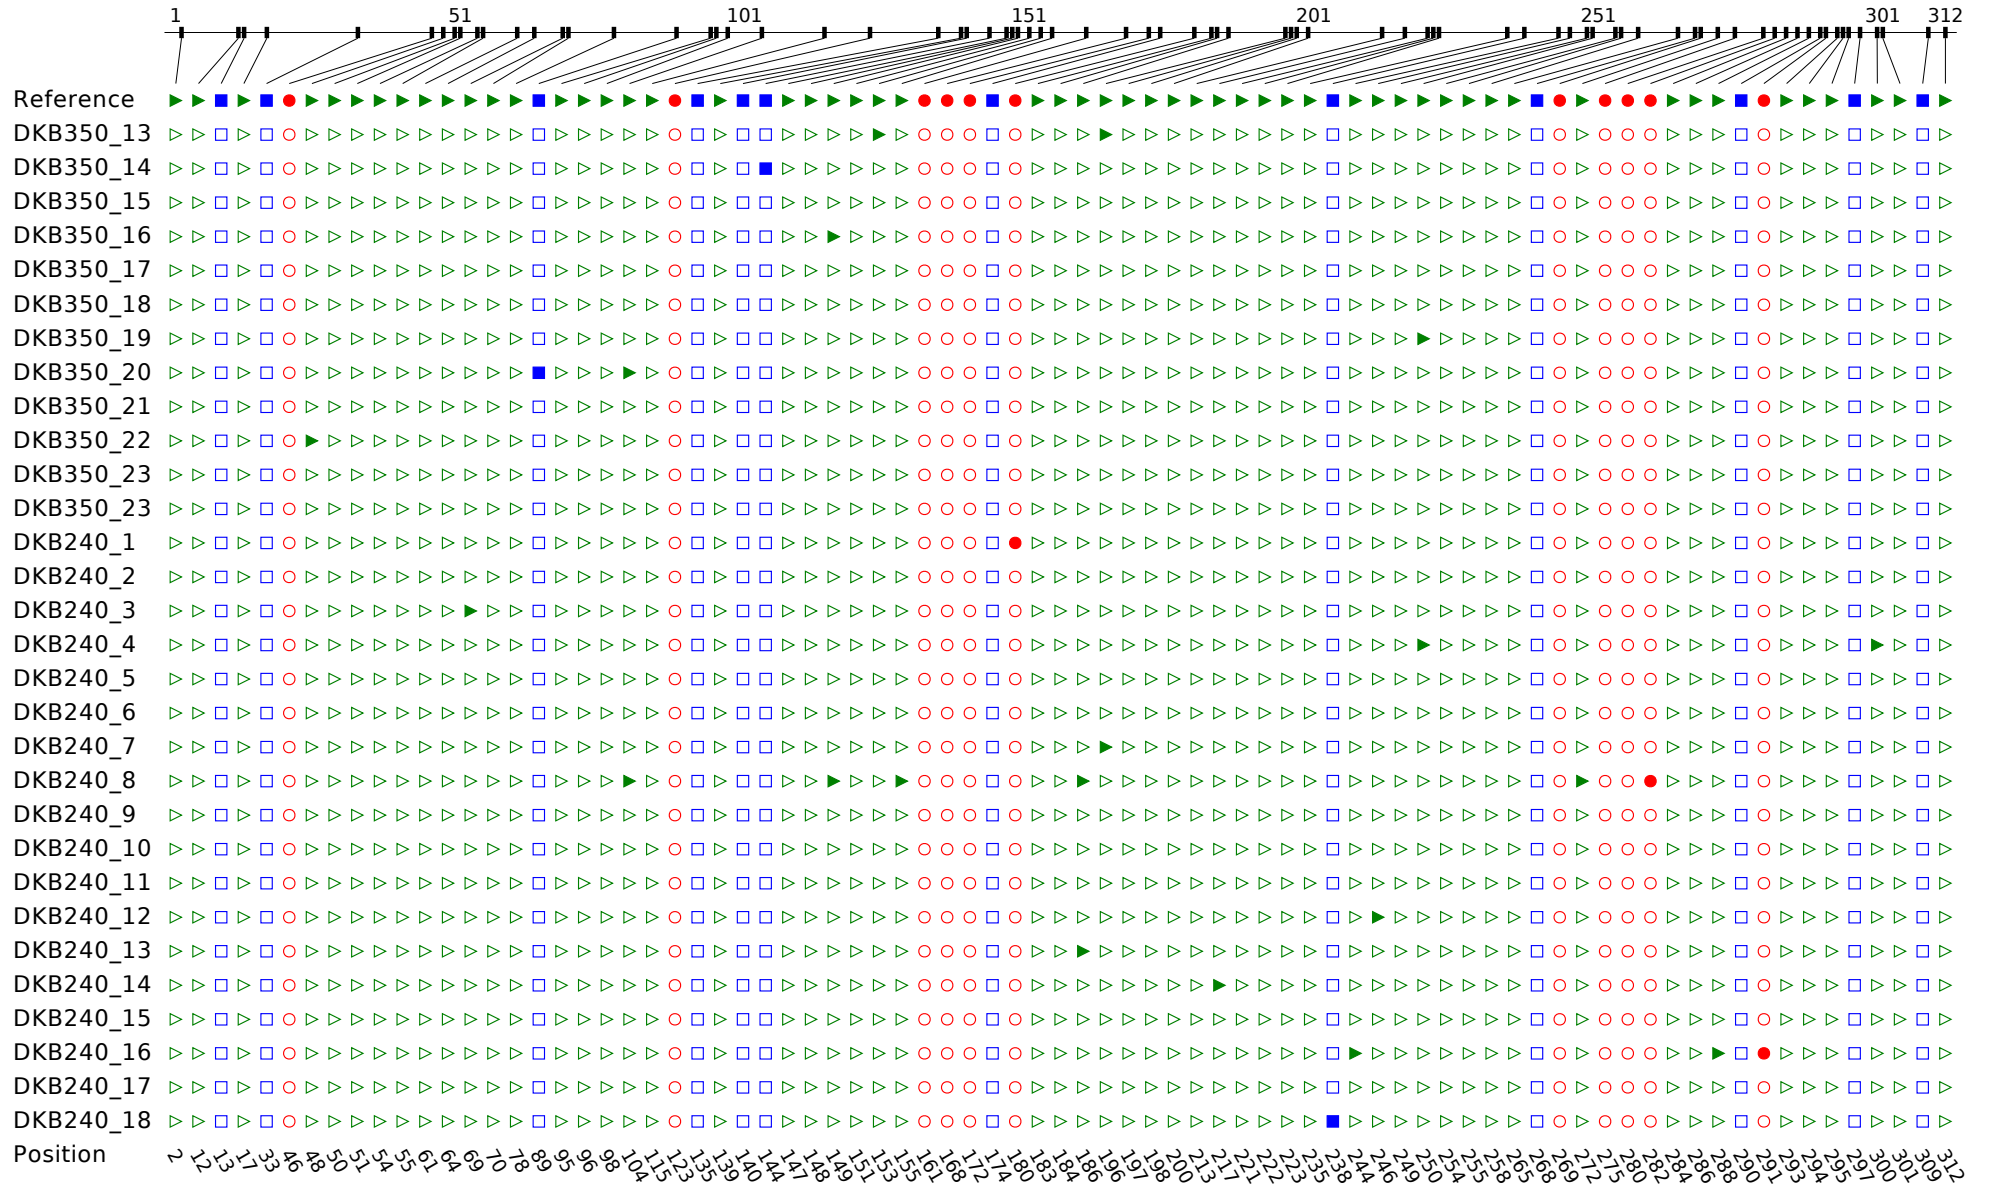



CyMATE (c) 2007, 2008  
 Methylation overview of 'FMV\_fragment.afa'

Class 1: ● me    ○ not me  
 Class 2: ■ me    □ not me  
 Class 3: ► me    ▷ not me

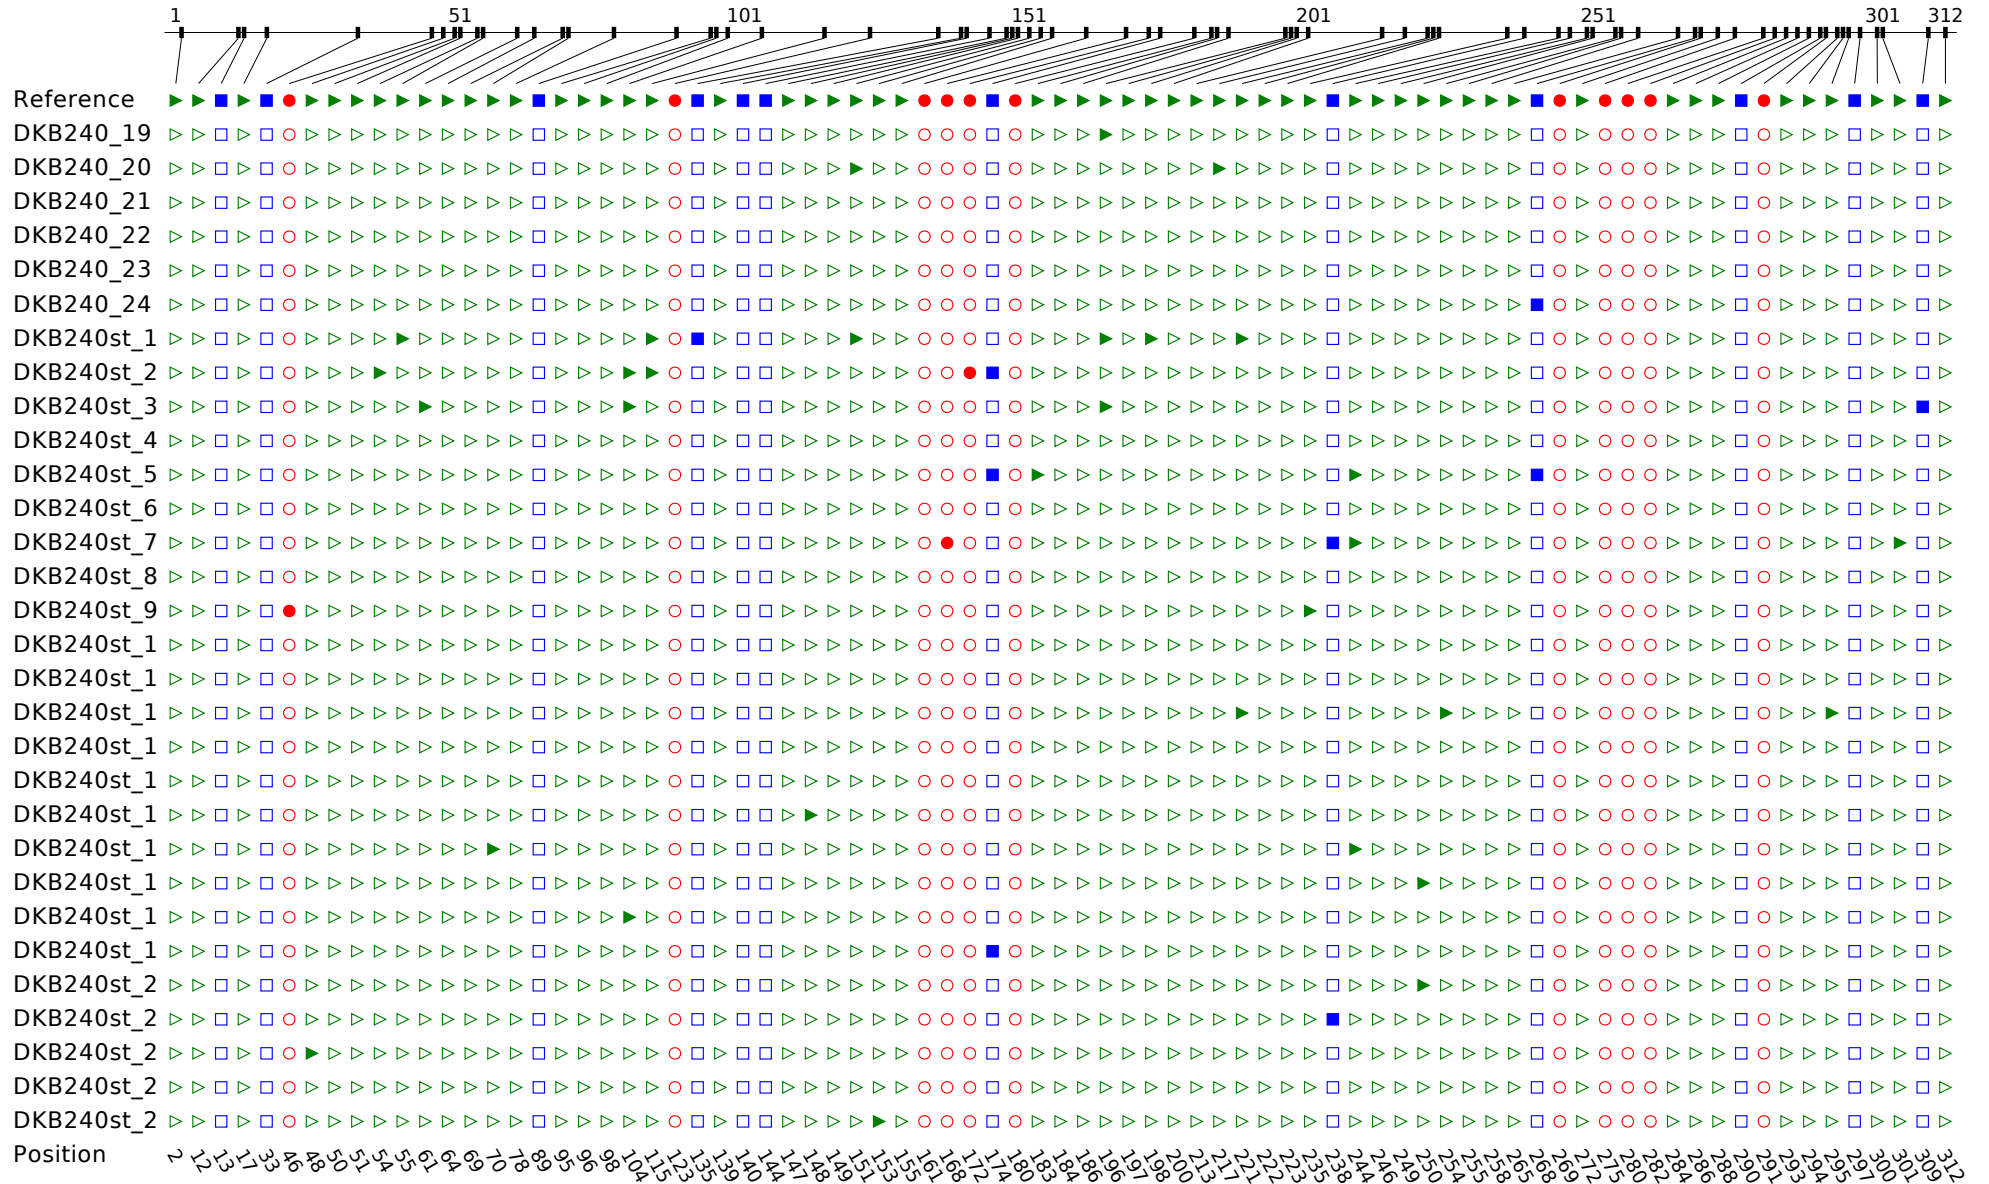

Supplement: 12302_2016_97_MOESM5_ESM.pdf [file 12302_2016_97_MOESM5_ESM.pdf]
